# Supplementary material
Source: publisher site journal article supplement (https://www.dovepress.com/article/215586)
Supplement: Supplementary file 1 [file get_supplementary_file.php]

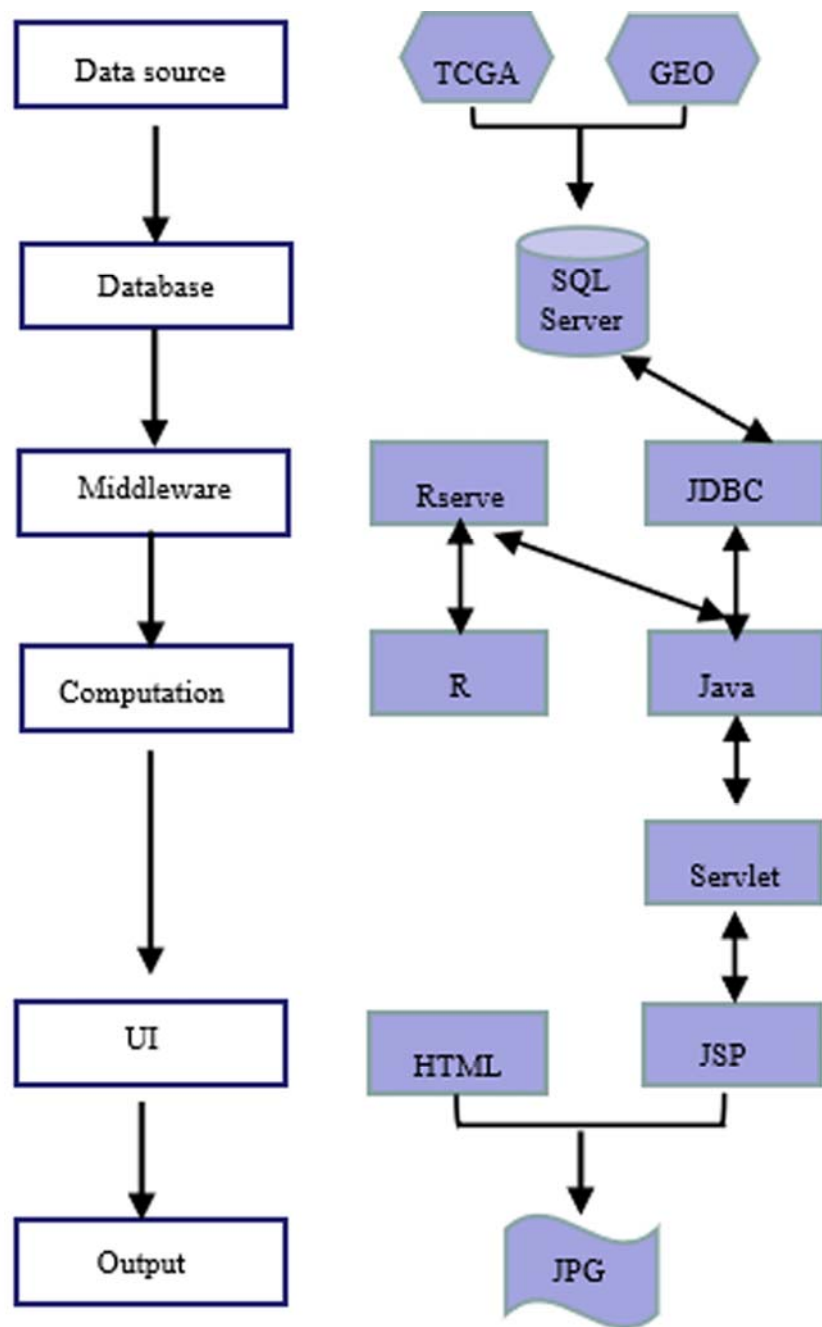

Figure S1. The flowchart of constructing the web tool OSacc.

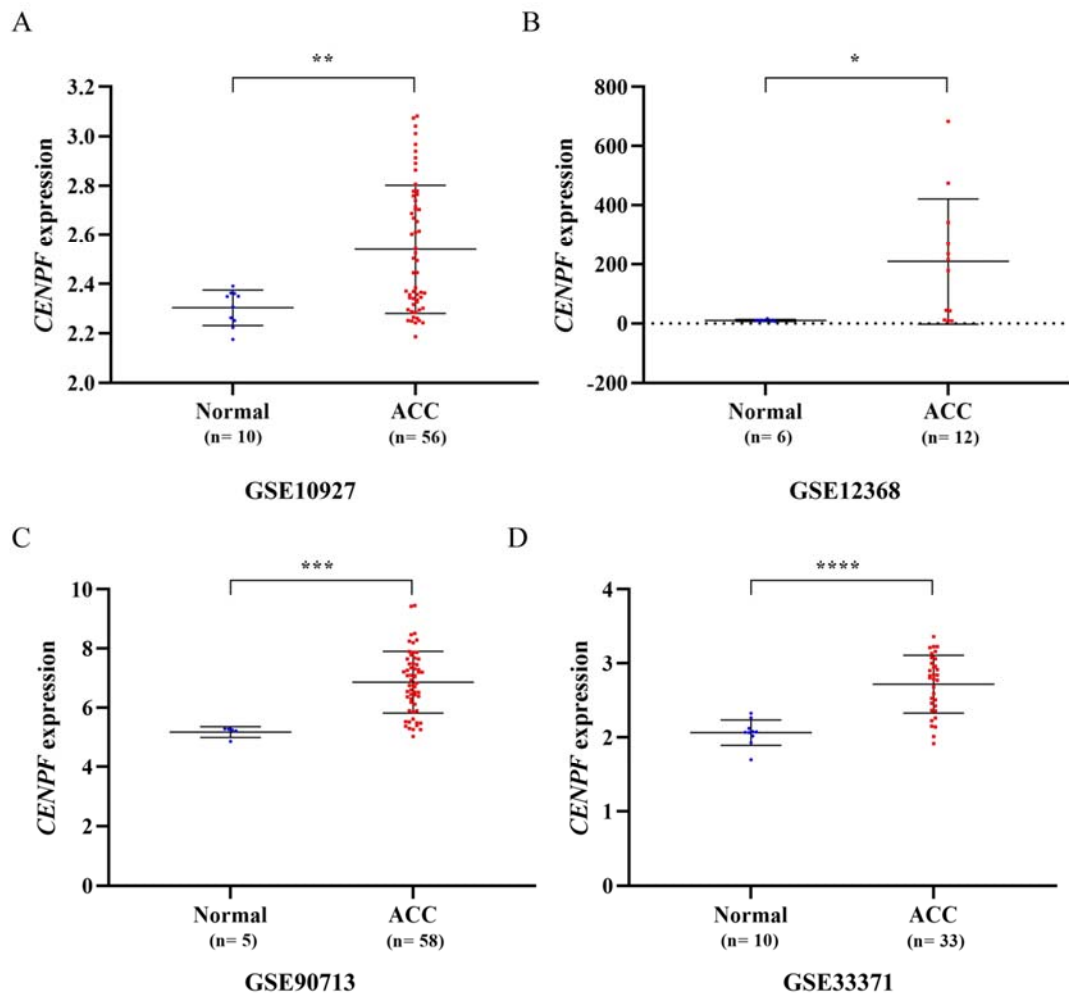

Figure S2. Gene expression of *CENPF* in 4 GEO datasets (GSE10927, GSE12368, GSE90713 and GSE33371). The four datasets all show *CENPF* highly expressed in ACC tissues compared with normal tissues. \* represents  $p < 0.05$ ; \*\* represents  $p < 0.01$ ; \*\*\* represents  $p < 0.001$ ; \*\*\*\* represents  $p < 0.0001$ .
